# Supplementary material for: Postprandial Apolipoprotein B48 is Associated with Subclinical Atherosclerosis in Patients with Rheumatoid Arthritis
Source: PubMed Central journal article supplement (PMC7465472; doi:10.3390/jcm9082483), 2020-08-02
Supplement: jcm-09-02483-s001.pdf [file jcm-09-02483-s001.pdf]

# Postprandial Apolipoprotein B48 is Associated with Subclinical Atherosclerosis in Patients with Rheumatoid Arthritis

Natalia Mena-Vázquez <sup>1,2</sup>, Marta Rojas-Gimenez <sup>3,\*</sup>, Francisco Gabriel Jimenez Nuñez <sup>1,2</sup>, Sara Manrique-Arija <sup>1,2</sup>, José Rioja <sup>1,4</sup>, Patricia Ruiz-Limón <sup>1,5</sup>, Inmaculada Ureña <sup>1,2</sup>, Manuel Castro-Cabezas <sup>6</sup>, Pedro Valdivielso <sup>1,4,7,†</sup> and Antonio Fernández-Nebro <sup>1,2,4,†</sup>

<sup>1.</sup> Instituto de Investigación Biomédica de Málaga (IBIMA), 29010, Málaga, Spain; nataliamenavazquez@gmail.com (N.M.-V.); sarama\_82@hotmail.com (S.M.-A.); jose.rioja@uma.es (J.R.); patrilimon@hotmail.com (P.R.-L.); inuregar@gmail.com (I.U.); valdivielso@uma.es (P.V.); afnebro@gmail.com (A.F.-N.)

<sup>2.</sup> UGC de Reumatología, Hospital Regional Universitario de Málaga, 29009, Málaga, Spain

<sup>3.</sup> UGC de Reumatología, Instituto Maimónides de Investigación Biomédica de Córdoba (IMIBIC), Hospital Universitario Reina Sofía, Córdoba, Spain; cortesfra@gmail.com (F.G.J.N.)

<sup>4.</sup> Departamento de Medicina y Dermatología, Universidad de Málaga, Málaga, Spain.

<sup>5.</sup> Unidad de Gestión Clínica de Endocrinología y Nutrición, Hospital Clínico Virgen de la Victoria, 29010, Málaga, Spain

<sup>6.</sup> Department of Internal Medicine, Franciscus Gasthuis & Vlietland, Rotterdam, The Netherlands; m.castrocabezas@franciscus.nl

<sup>7.</sup> UGC de Medicina Interna, Hospital Universitario Virgen de la Victoria, Universidad de Málaga, Málaga, Spain.

\* Correspondence: rojasgimenezm@gmail.com; Tel.: +xx-xxxx-xxx-xxxx

**Table S1.** Lipid profile and carotid ultrasound in control group according to cIMT.

| Variable                                   | Control group with IMT >p90 <i>n</i> = 9 |                     | Control group with IMT ≤p90 <i>n</i> = 31 |                     | Control group with IMT >p90 vs with IMT ≤p90 <i>p</i> -value |              |
|--------------------------------------------|------------------------------------------|---------------------|-------------------------------------------|---------------------|--------------------------------------------------------------|--------------|
|                                            | Fasting                                  | Postprandial        | Fasting                                   | Postprandial        | Fasting                                                      | Postprandial |
| <b>Fasting lipid profile</b>               |                                          |                     |                                           |                     |                                                              |              |
| Total cholesterol (mg/dl), median (IQR)    | 190.0 (171.1–226.5)                      | 189.0 (166.5–220.5) | 202.0 (176.0–236.0)                       | 201.5 (167.7–227.0) | 0.656                                                        | 0.678        |
| LDL cholesterol (mg/dl), median (IQR)      | 110.0 (83.5–148.0)                       | 108.0 (75.5–131.5)  | 120.0 (96.0–142.0)                        | 108.5 (83.0–128.0)  | 0.667                                                        | 0.638        |
| HDL cholesterol (mg/dl), median (IQR)      | 56.0 (45.5–74.0)                         | 53.0 (46.5–68.5)    | 60.0 (48.0–71.0)                          | 58.0 (45.0–66.0)    | 0.762                                                        | 0.830        |
| Triglycerides (mg/dl), median (IQR)        | 72.0 (54.5–140.5)                        | 116.5 (67.7–206.7)  | 86.0 (60.0–128.0)                         | 136.0 (97.2–170.0)  | 0.545                                                        | 0.473        |
| Chylomicrons (triglycerides), median (IQR) | 15.2 (5.3–42.9)                          | 51.2 (15.3–78.2)    | 17.0 (7.5–45.3)                           | 54.3 (32.4–80.7)    | 0.831                                                        | 0.473        |

|                                            |                    |                   |                   |                   |       |       |
|--------------------------------------------|--------------------|-------------------|-------------------|-------------------|-------|-------|
| Chylomicrons (cholesterol), median (IQR)   | 5.5 (2.6–22.4)     | 29.1 (5.5–36.8)   | 11.0 (7.5–45.3)   | 14.1 (8.7–32.9)   | 0.509 | 0.497 |
| VLDL (triglycerides), median (IQR)         | 13.6 (8.5–43.7)    | 24.2 (11.2–57.1)  | 20.7 (9.8–31.1)   | 25.0 (17.9–38.1)  | 0.935 | 0.911 |
| VLDL (cholesterol), median (IQR)           | 5.9 (1.6–14.1)     | 7.1 (4.0–15.6)    | 5.7 (2.8–8.3)     | 7.4 (3.9–10.6)    | 0.730 | 0.543 |
| ApoB48, median (IQR)                       | 5.2 (4.6–8.0)      | 14.4 (9.4–15.6)   | 8.3 (6.4–11.8)    | 13.9 (11.7–17.2)  | 0.116 | 0.274 |
| ApoB total, median (IQR)                   | 101.9 (80.0–108.0) | 94.1 (74.0–105.1) | 96.8 (82.4–111.2) | 92.9 (76.7–104.0) | 0.975 | 0.846 |
| <b>Increased postprandial blood lipids</b> |                    |                   |                   |                   |       |       |
| Triglycerides (mg/dl), median (IQR)        |                    | 42.7 (16.1–128.8) |                   | 48.4 (32.2–75.8)  |       | 0.709 |
| Chylomicrons (triglycerides), median (IQR) |                    | 29.3 (11.8–135.3) |                   | 33.5 (13.1–64.0)  |       | 0.289 |
| VLDL (triglycerides), median (IQR)         |                    | 9.8 (2.2–22.4)    |                   | 8.4 (2.0–17.7)    |       | 0.975 |
| ApoB48, median (IQR)                       |                    | 6.7 (3.3–9.9)     |                   | 6.9 (2.2–9.8)     |       | 0.920 |

\*  $p < 0.005$  fasting vs postprandial value. Abbreviations: cIMT, carotid intima media thickness; LDL, low-density lipoprotein; HDL, high-density lipoprotein; TG, triglycerides; VLDL, very-low-density lipoprotein.

**Table S2.** Lipid profile and carotid ultrasound in RA patients according to cIMT excluded the men.

| Variable                                   | RA with IMT >p90 n=6 |                     | RA with IMT ≤p90 n = 29 |                     | RA with IMT >p90 vs RA with IMT ≤p90 |              |
|--------------------------------------------|----------------------|---------------------|-------------------------|---------------------|--------------------------------------|--------------|
|                                            | Fasting              | Postprandial        | Fasting                 | Postprandial        | Fasting                              | Postprandial |
| <b>Fasting lipid profile</b>               |                      |                     |                         |                     |                                      |              |
| Total cholesterol (mg/dl), median (IQR)    | 234.5 (212.7–255.7)  | 210.0 (195.2–252.5) | 212.0 (185.5–227.5)     | 200.0 (177.0–228.0) | 0.176                                | 0.235        |
| LDL cholesterol (mg/dl), median (IQR)      | 139.0 (133.0–165.5)  | 116.0 (105.7–145.0) | 122.0 (103.5–140.5)     | 110.0 (94.0–129.5)  | 0.164                                | 0.312        |
| HDL cholesterol (mg/dl), median (IQR)      | 66.5 (60.2–78.2)     | 62.5 (55.7–72.2)    | 66.0 (53.5–80.5)        | 62.0 (52.5–77.0)    | 0.749                                | 0.783        |
| Triglycerides (mg/dl), median (IQR)        | 112.0 (83.5–165.7)   | 195.0 (125.2–326.5) | 74.0 (63.0–105.0)       | 111.0 (83.0–163.5)  | 0.021                                | 0.042        |
| Chylomicrons (triglycerides), median (IQR) | 52.7 (16.6–64.9) *   | 77.7 (22.9–195.4) * | 13.8 (8.7–20.9)         | 34.2 (21.7–48.9)    | 0.011                                | 0.052        |

|                                            |                    |                    |                   |                   |       |       |
|--------------------------------------------|--------------------|--------------------|-------------------|-------------------|-------|-------|
| Chylomicrons (cholesterol), median (IQR)   | 13.4 (8.0–23.3)    | 15.5 (5.7–33.2)    | 8.5 (6.0–10.7)    | 14.3 (7.2–23.2)   | 0.093 | 0.782 |
| VLDL (triglycerides), median (IQR)         | 27.2 (21.9–42.4)   | 37.3 (17.3–60.0)   | 13.8 (9.7–23.1)   | 20.7 (12.9–38.7)  | 0.011 | 0.098 |
| VLDL (cholesterol), median (IQR)           | 5.9 (4.9–10.7)     | 8.8 (3.4–12.7)     | 2.7 (1.9–5.4)     | 3.9 (2.6–8.9)     | 0.014 | 0.048 |
| ApoB48, median (IQR)                       | 7.5 (5.5–12.1) *   | 23.7 (10.0–31.1) * | 7.0 (6.1–10.2)    | 13.4 (10.4–18.4)  | 0.685 | 0.046 |
| ApoB total, median (IQR)                   | 104.0 (98.9–120.8) | 106.3 (89.8–114.0) | 94.5 (79.2–105.5) | 91.9 (75.3–103.0) | 0.093 | 0.062 |
| <b>Increased postprandial blood lipids</b> |                    |                    |                   |                   |       |       |
| Triglycerides (mg/dl), median (IQR)        |                    | 63.7 (16.2–140.0)  |                   | 35.7 (17.1–61.6)  |       | 0.279 |
| Chylomicrons (triglycerides), median (IQR) |                    | 46.4 (11.0–147.0)  |                   | 20.0 (10.2–34.7)  |       | 0.042 |
| VLDL (triglycerides), median (IQR)         |                    | 11.8 (6.4–22.0)    |                   | 7.0 (3.0–16.3)    |       | 0.454 |
| ApoB48, median (IQR)                       |                    | 13.0 (6.2–16.4)    |                   | 6.7 (3.4–8.4)     |       | 0.032 |

\*  $p < 0.005$  fasting vs postprandial value. Abbreviations: cIMT, carotid intima media thickness; LDL, low-density lipoprotein; HDL, high-density lipoprotein; TG, triglycerides; VLDL, very-low-density lipoprotein.
